# Supplementary material
Source: PubMed Central journal article supplement (PMC9346120)
Supplement: 41418_2022_942_MOESM4_ESM.pdf [file 41418_2022_942_MOESM4_ESM.pdf]

Please complete the table below to indicate the contributions of all named authors to the figures.

Figure 1:

|  |
|--|
|  |
|--|

Figure 2:

|  |
|--|
|  |
|--|

Figure 3:

|  |
|--|
|  |
|--|

Figure 4:

|  |
|--|
|  |
|--|

Figure 5:

|  |
|--|
|  |
|--|

Figure 6:

|  |
|--|
|  |
|--|

Signed for and on behalf of the Author(s):

Jun Cui

Print Name:

|  |
|--|
|  |
|--|

Date:

|  |
|--|
|  |
|--|
